# Supplementary material for: Dietary mineral intake was correlated with seral HDL-C in patients with type 2 diabetes
Source: Research Square preprint supplement (doi:10.21203/rs.3.rs-6019693/v1), 2025-02-19
Supplement: Supplementary file 1 [file 6653427722e03d9fab318ed0.docx]

Supplementary Table 1. Correlation between macro-nutrient intake and blood lipids

|  | Total cholesterol | |  | Triglycerides | |  | LDL | |  | HDL | |
| --- | --- | --- | --- | --- | --- | --- | --- | --- | --- | --- | --- |
| R | P value |  | r | P value |  | r | P value |  | r | P value |
| Energy(kcal/d) | -0.011 | 0.899 |  | -0.091 | 0.285 |  | -0.073 | 0.392 |  | 0.051 | 0.547 |
| Proportion of Carbohydrates (%/) | 0.034 | 0.687 |  | 0.158 | 0.063 |  | 0.106 | 0.215 |  | -0.222 | 0.008 |
| Proportion of Fat (%/) | -0.050 | 0.556 |  | -0.106 | 0.213 |  | -0.105 | 0.219 |  | 0.085 | 0.321 |
| Proportion of protein (%/) | 0.050 | 0.554 |  | -0.088 | 0.299 |  | 0.036 | 0.672 |  | 0.264 | 0.002 |
| Dietary Fiber (g/d) | -0.061 | 0.472 |  | -0.058 | 0.495 |  | -0.065 | 0.448 |  | -0.140 | 0.099 |
